# Supplementary material for: High-performance PVDF membranes prepared by the combined crystallisation and diffusion (CCD) method using a dual-casting technique: a breakthrough for water treatment applications
Source: Royal Society of Chemistry journal article supplement (doi:10.1039/d1ee02009a), 2021-01-01
Supplement: d1ee02009a1.pdf [file d1ee02009a1.pdf]

## Electronic Supplementary Information (ESI)

### High performance PVDF membranes prepared by the Combined Crystallisation and Diffusion (CCD) using a dual-casting technique: a breakthrough for water treatment applications

Vatsal Shah<sup>a,b</sup>, Bo Wang<sup>a,b</sup>, Kang Li<sup>a,b</sup> \*

<sup>a</sup>Barrer Centre, Imperial College London, London SW7 2AZ, UK.

<sup>b</sup>Department of Chemical Engineering, Imperial College London, London SW7 2AZ, UK.

\*Corresponding author, E-mail: [kang.li@imperial.ac.uk](mailto:kang.li@imperial.ac.uk)

### Materials

Commercial PVDF (Kynar®K-761, MW = 440,000 Da,  $\rho = 1.79 \text{ g/cm}^3$ ) was purchased from Elf Atochem. DMSO (HPLC grade), isobutanol (HPLC grade), n-hexane (GPR), and ethanol were purchased from VWR, UK. DMSO was used as a solvent for PVDF in preparing dope solutions. Isobutanol was used to prepare an isobutanol-water mixture for liquid-liquid porometry. Ethanol and n-hexane were used in solvent exchange steps before drying the membranes. The dried membranes were then used for SEM imaging.

### Membrane Characterisation

#### *Scanning Electron Microscope (SEM)*

The morphology of the membranes prepared is observed using SEM (LEO Gemini 1525 FEGSEM, Tokyo, Japan). For sample preparation, wet membrane samples are first subjected to two cycles of ethanol immersion, followed by two cycles of n-hexane immersion, with each immersion cycle lasting a period of 4 hours. After immersion, the membranes are dried out and used for SEM. The membrane cross-section samples are prepared by fracturing the dried membranes in liquid nitrogen. The prepared samples are finally gold-coated at 10nm thickness to make the surface electrically conductive, ready for SEM observation

#### *Liquid-Liquid Displacement Porometry*

The pore sizes and the pore size distribution were measured using a liquid-liquid displacement porometer (LLP 1500A, Porous Materials Inc., USA). A mixture of 1:1 (v/v) isobutanol-water is

prepared which separates into two equilibrated phases - an isobutanol rich phase and a water-rich phase. The membranes are pre-wet with isobutanol rich phase while the water-rich phase is used to push the wetting liquid out of the pores by application of pressure. At each step change in pressure, the permeate flux is measured. The pore sizes corresponding to the operating pressure is given by Young-Laplace equation:

$$d = \frac{4 \cdot \gamma \cdot \cos\theta}{\Delta p} \quad \text{Equation 1}$$

where  $d$  is the pore diameter,  $\gamma$  is the interfacial tension between the two liquids (1.7 mN/m),  $\theta$  is the contact angle of the wetting liquid on the membrane surface (taken as 0 ° due to complete spreading) and  $\Delta p$  is the pressure difference across the membrane.

### **Pure Water Permeance (PWP)**

The PWPs of the membranes were characterised using a 1000ml dead-end filtration cell. Pure water was used as the feed liquid and the applied pressure difference was 1 bar. The permeance measurements were taken for a period of 20 mins and can be calculated using the following formula:

$$PWP = \frac{J_w}{p} = \frac{V}{A \times \Delta t \times p} \quad \text{Equation 2}$$

where  $PWP$  is the pure water permeance ( $\text{L} \cdot \text{m}^{-2} \cdot \text{hr}^{-1} \cdot \text{bar}^{-1}$  or  $\text{LMH} \cdot \text{bar}^{-1}$ ),  $J_w$  is the pure water flux ( $\text{L} \cdot \text{m}^{-2} \cdot \text{hr}^{-1}$  or  $\text{LMH}$ ),  $V$  is the permeated volume (litres) in time  $\Delta t$  (hours),  $A$  is the effective membrane area ( $\text{m}^2$ ) and  $p$  is the applied pressure difference (bar). 5 sample measurements were performed from different membranes of each type and the average of these values was reported as the PWP.

### **Mechanical Strength**

Mechanical properties of the membranes were tested according to a standard method described in the American Society for Testing and Materials (ASTM) D882 using a tensile testing machine, Lloyd EZ50. The width of the samples was fixed at 10mm and the gauge length at 50mm. The thickness of the samples was measured using a digital caliper. The samples were then stretched at a constant rate of 10mm/min, and the tensile force was recorded by a transducer. Different parameters such as load applied, elongation ratio, tensile stress and Young's modulus were recorded and measured. For each membrane type, 10 samples were tested and the average value was then reported.

## Supplementary figures

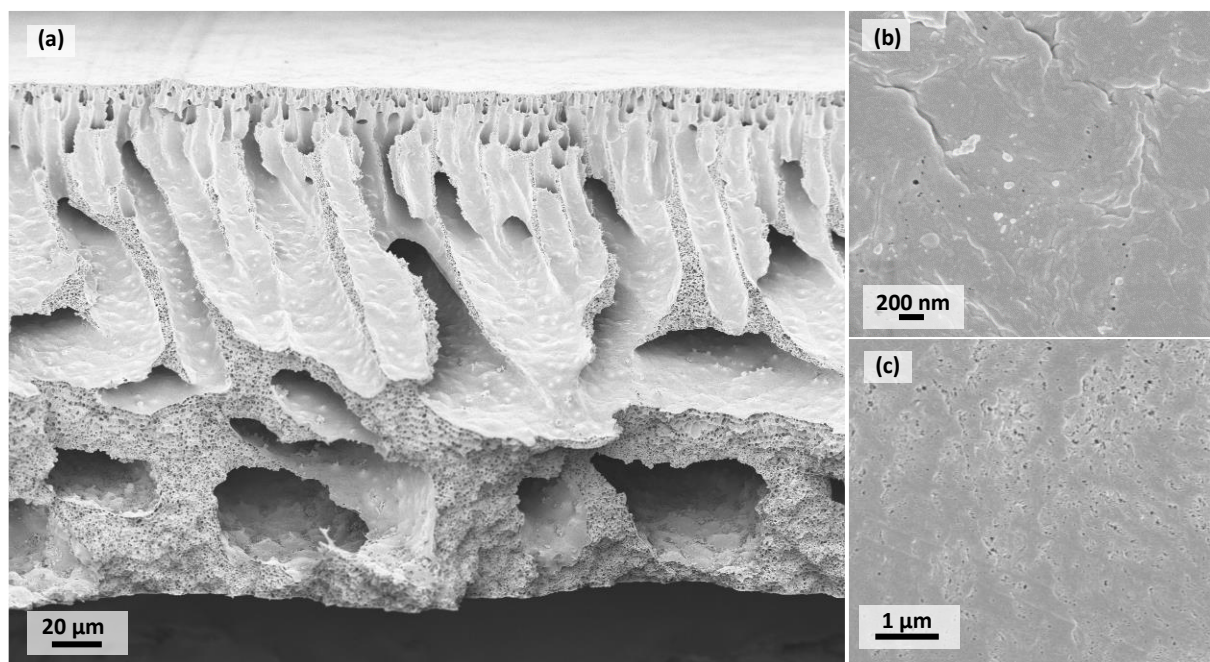

Figure S1. SEM images of 20PVDF\_NIPS showing (a) cross-sectional overview; (b) top surface view; (c) bottom surface view

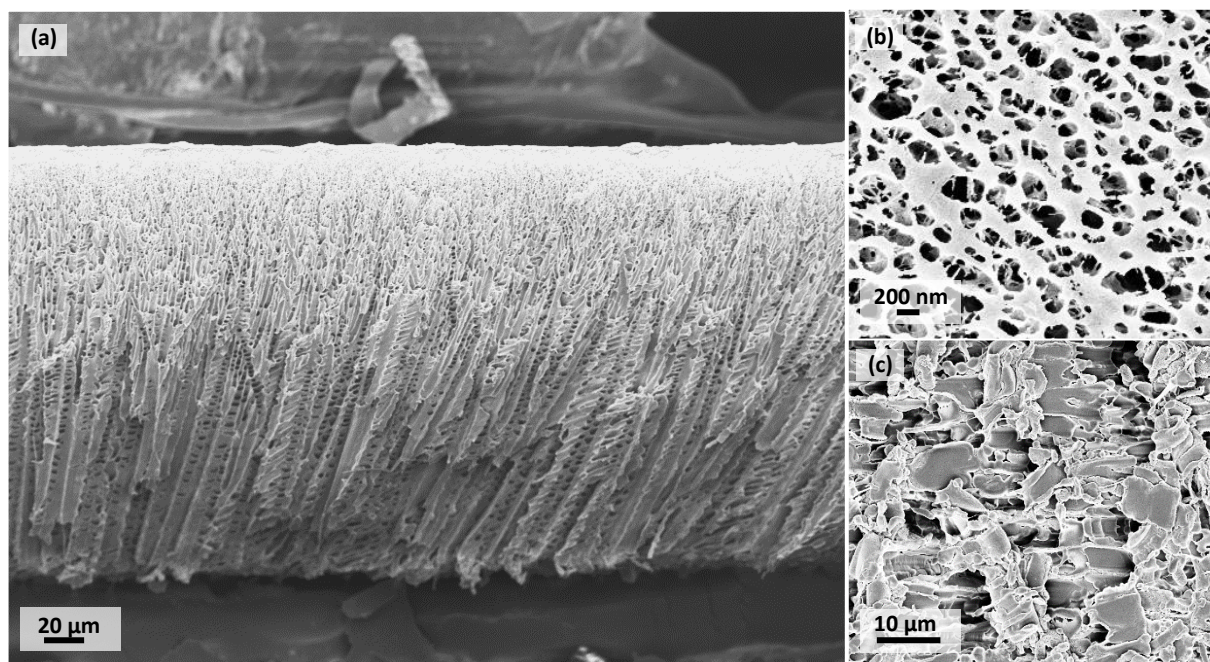

Figure S2. SEM images of 15PVDF\_CCD showing (a) cross-sectional overview; (b) top surface view; (c) bottom surface view



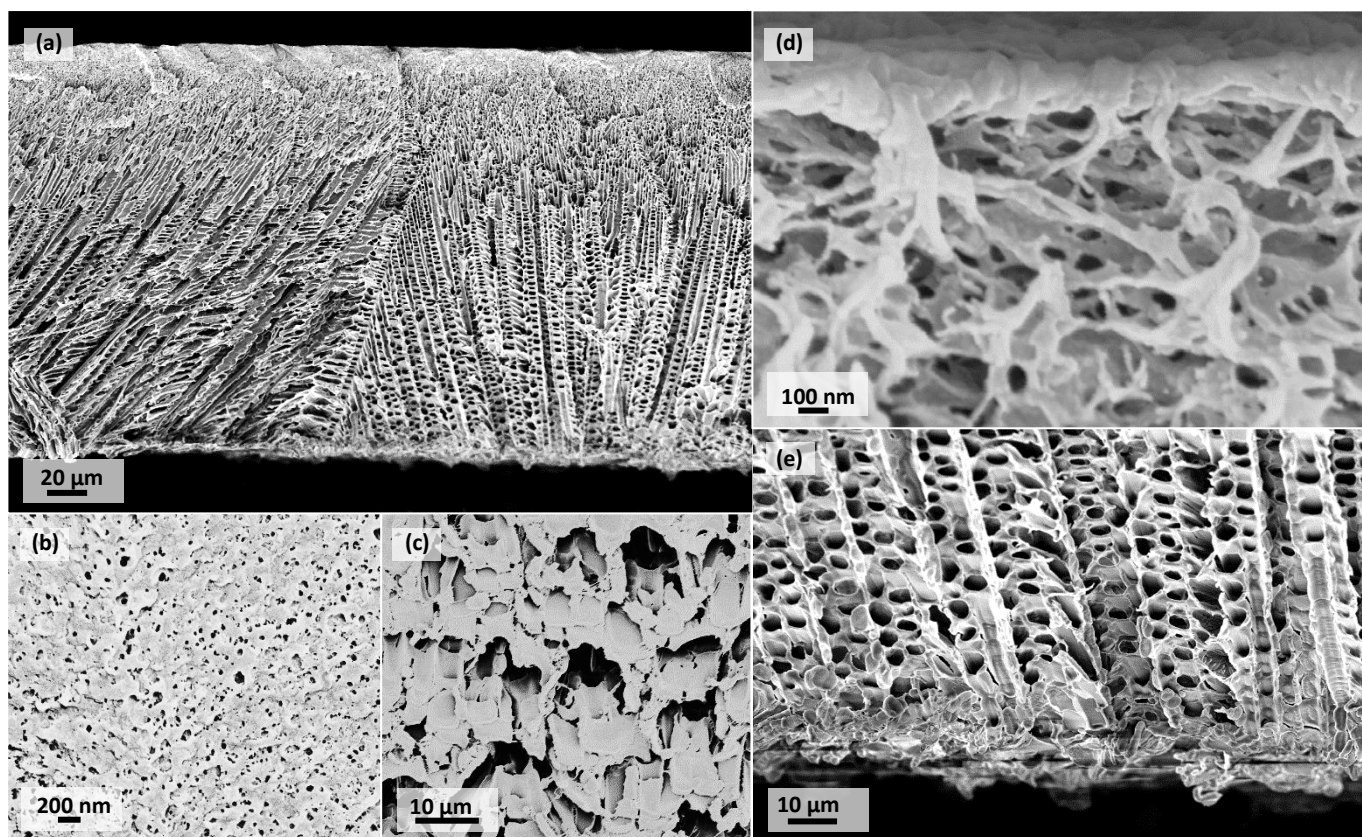

Figure S3. SEM images of 20PVDF\_15PVDF\_CCD showing (a) the cross-sectional overview; (b) top surface view; (c) bottom surface view; (d) cross-sectional view of the separation layer; (e) cross-sectional view of the microchannels found in the support layer

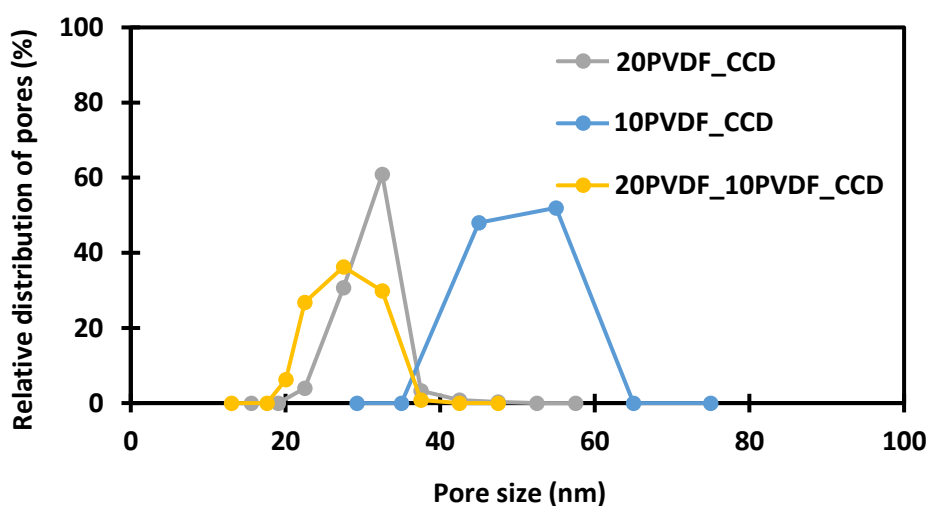

Figure S4. Pore size distribution comparison of 20PVDF\_CCD, 10PVDF\_CCD and 20PVDF\_10PVDF\_CCD

## Supplementary Tables

Table S1. Compilation of pore sizes (nm) and pure water permeances (LMH.bar<sup>-1</sup>) from various literature works on ultrafiltration PVDF membranes.

| Modification                            | Membrane                                                                   | Pore size (nm) | PWP (LMH.bar <sup>-1</sup> ) | Reference |
|-----------------------------------------|----------------------------------------------------------------------------|----------------|------------------------------|-----------|
| Pure PVDF membranes                     | PVDF with varying solvents                                                 | N/A but UF     | 68.76                        | 1         |
|                                         | PVDF with mixed solvents                                                   | 40             | 143                          | 2         |
|                                         | PVDF with increased evaporation time (airgap)                              | 69             | 152                          | 3         |
|                                         | PVDF with ethanol as internal coagulant                                    | 88             | 155                          | 3         |
| Modified with small molecular additives | PVDF with small molecular additives                                        | 45             | 291                          | 4         |
|                                         | PVDF with ethylene glycol as non-solvent additive                          | 34.28          | 25.4                         | 5         |
|                                         | PVDF with 1,2 ethanediol as non-solvent additive                           | 36             | 49                           | 6         |
| Modified with polymeric additives       | PVDF blend with PVP                                                        | 44             | 309                          | 7         |
|                                         | PVDF blend with PVA                                                        | 47             | 259                          | 7         |
|                                         | PVDF blend with PMMA                                                       | 15-25          | 209                          | 8         |
|                                         | PVDF blend with cellulose nanocrystals                                     | 31             | 207                          | 9         |
| Modified with inorganic additives       | PVDF blend with LiCl.H <sub>2</sub> O and TiO <sub>2</sub>                 | 34             | 82.5                         | 10        |
|                                         | PVDF blend with TiO <sub>2</sub> nanoparticles                             | 47             | 112                          | 11        |
|                                         | PVDF blend with Al <sub>2</sub> O <sub>3</sub> nanoparticles               | 20-50          | 200-225                      | 12        |
|                                         | PVDF blend with SiO <sub>2</sub> sol                                       | 99             | 301                          | 13        |
|                                         | PVDF blend with TiO <sub>2</sub> nanowire                                  | 44             | 266                          | 14        |
|                                         | PVDF blend with graphene oxide                                             | 55             | 458                          | 15        |
|                                         | PVDF blend with graphene oxide and PVP                                     | N/A but UF     | 360                          | 16        |
|                                         | PVDF blend with reduced graphene oxide and TiO <sub>2</sub> nanocomposites | 76             | 77                           | 17        |
|                                         | PVDF blend with graphene oxide                                             | 13             | 27                           | 18        |
|                                         | PVDF blend with zinc oxide-graphene oxide composites                       | 43             | 171                          | 19        |
|                                         | PVDF blend with graphene oxide and TiO <sub>2</sub>                        | 65             | 488                          | 20        |
|                                         | PVDF blend with Zinc-Iron oxides nanoparticles                             | 29             | 224                          | 21        |
|                                         | PVDF blend with graphene oxide-PEG nanocomposites                          | 25.3           | 94                           | 22        |
|                                         | PVDF blend with TiO <sub>2</sub> -HNTs nanocomposites                      | 93.9           | 354                          | 23        |
|                                         | PVDF blend with hydrothermal carbon nanospheres                            | 58.3           | 950                          | 24        |
|                                         | PVDF blend with Mg-Al nanolayered double hydroxide                         | 55             | 351                          | 25        |

|                                      |                                                                                          |            |       |    |
|--------------------------------------|------------------------------------------------------------------------------------------|------------|-------|----|
|                                      | PVDF blend with PVP and graphene oxide nanoribbons                                       | 62.4       | 532   | 26 |
|                                      | PVDF blend with PVP-TiO <sub>2</sub> -dopamine                                           | 64         | 243   | 27 |
|                                      | PVDF blend with nano-ZnO particles                                                       | 31         | 147   | 28 |
|                                      | PVDF blend with TiO <sub>2</sub> -activated carbon                                       | 31         | 225   | 29 |
|                                      | PVDF blend with Fe <sub>3</sub> O <sub>4</sub> -palygorskite nanocomposites              | 21         | 356   | 30 |
|                                      | PVDF blend with Mg-Al LDH nanoparticles                                                  | 32         | 106.5 | 31 |
|                                      | Hydroxyl functionalized PVDF-TiO <sub>2</sub>                                            | 60         | 50    | 32 |
|                                      | PVDDF blend with grapheneoxide-TiO <sub>2</sub> nanocomposites                           | 78.4       | 75    | 33 |
|                                      | PVDF with modified with polydopamine polymerisation and ammonium fluotitanate hydrolysis | N/A but UF | 228   | 34 |
| Modified with graft/block copolymers | PVDF blend with PFSA-g-graphene oxide                                                    | 77         | 587   | 35 |
|                                      | PVDF blend with sulfonated poly( $\alpha,\beta,\beta$ -trifluorostyrene)                 | 40-50      | 103   | 36 |
|                                      | PVDF blend with poly(aminoanthraquinone)/reduced graphene oxide                          | 11         | 70    | 37 |
|                                      | PVDF modified with self-doped sulfonated polyaniline                                     | N/A but UF | 160   | 38 |
|                                      | PVDF blend with PMMA-b-PSBMA                                                             | 30         | 188   | 39 |
|                                      | PVDF blend with PVP-g-MMT nanocomposites                                                 | 16         | 75    | 40 |
|                                      | PVDF blend with SiO <sub>2</sub> -g-PDMS nanoparticles                                   | 16         | 115   | 41 |
|                                      | PVDF blend with PVDF-g-PMEMA                                                             | 58.4       | 77    | 42 |
|                                      | PVDF-blend with PVDF-g-PEGMA                                                             | 73         | 7779  | 43 |
|                                      | PVDF-blend with PVDF-g-PEGMA                                                             | 31         | 5170  | 44 |
| Other methods                        | PVDF with graphene oxide-water as coagulation bath                                       | 91         | 460   | 45 |
|                                      | Electrospun PVDF nanofibers with top chitosan layer                                      | N/A but UF | 205   | 46 |

Note: Many studies characterise pore sizes in many different ways and do not follow a standardised method. Therefore, these values should be used for reference purposes only to get an approximate idea of the membrane's separation capabilities. Also the reporting of pure water permeances varies significantly across various studies. For some studies the pure water flux ( $\text{L}\cdot\text{m}^{-2}\cdot\text{hr}^{-1}$  or LMH) values were read off from the figures and so would only be approximate values. These values have been converted using the operating conditions mentioned in the respective studies to units of permeances which is  $\text{LMH}\cdot\text{bar}^{-1}$  ( $\text{L}\cdot\text{m}^{-2}\cdot\text{hr}^{-1}\cdot\text{bar}^{-1}$ ) to allow for fair comparison. Moreover, Table 1S is not an exhaustive list of all PVDF membrane related studies. Many studies work on PVDF microfiltration membranes and these have not been included in the Table 1S. Many studies that do focus on PVDF-UF membranes, either do not characterise the pore sizes or have gas permeability data instead of water permeability. Again these studies are not covered here.

Table 2S. Pure water permeances (PWP) and corresponding pore sizes of PVDF membranes produced commercially by industry leaders<sup>a</sup>

| Supplier     | Membrane Brand | Pore size (nm) | Operating conditions from data sheets <sup>b,c,d</sup>                                                                      | PWP <sup>e</sup> (LMH.bar <sup>-1</sup> ) | Ref. |
|--------------|----------------|----------------|-----------------------------------------------------------------------------------------------------------------------------|-------------------------------------------|------|
| Dow-Dupont   | IntegraPac     | 30             | Filtrate Flux = 40-90 L.m <sup>-2</sup> .hr <sup>-1</sup><br>Max TMP = 2.1 bar                                              | 40-90                                     | 47   |
|              | IntegraFlux    | 30             | Filtrate Flux = 40-110 L.m <sup>-2</sup> .hr <sup>-1</sup><br>Max TMP = 2.1 bar                                             | 40-110                                    | 48   |
| Suez         | ZeeWeed 1000   | 20             | Flow range = 55-110 m <sup>3</sup> .day <sup>-1</sup><br>Membrane area = 41.8-51.1 m <sup>2</sup><br>TMP range = 0-0.9 bar  | 61-122                                    | 49   |
|              | ZeeWeed 1500   | 20             | Flow range = 45-180 m <sup>3</sup> .day <sup>-1</sup><br>Membrane area = 55.7 m <sup>2</sup><br>TMP range = 0-2.76 bar      | 34-135                                    | 50   |
| Hydranautics | HYDRACap MAX   | 80             | Filtrate Flux = 34-110 L.m <sup>-2</sup> .hr <sup>-1</sup><br>Max TMP = 2 bar                                               | 34-110                                    | 51   |
| KOCH         | PURON          | 30             | Typical Production range = 2-6.8 m <sup>3</sup> .hr <sup>-1</sup><br>Membrane area = 51 m <sup>2</sup><br>Max TMP = 1.7 bar | 40-133                                    | 52   |
| QUA          | EnviQ          | 40             | Filtrate Flux = 10-25 L.m <sup>-2</sup> .hr <sup>-1</sup><br>TMP range = 2 psi-4 psi                                        | 72-180                                    | 53   |
| TORAY        | MEMBRAY        | 80             | Design Flow = 8-53 m <sup>3</sup> .day <sup>-1</sup><br>Membrane area = 70 m <sup>2</sup><br>TMP = 0.2 bar                  | 24-158                                    | 54   |

<sup>a</sup> The pure water permeances and pore sizes were obtained from specification data sheets published by the supplier. These data sheets were obtained from their respective websites.

<sup>b</sup> Different data sheets present filtration specifications in different ways. For some data sheets use the terms such as “Flow range”, “Production range” or “Design flow” instead of “Filtration flux” or “Permeation flux”. This value is assumed to be the permeate flow range and not the feed flow range in our calculation. This is because if it were to be the feed flow range, the permeate flow would be even lower.

<sup>c</sup> A conservative estimate of the transmembrane pressure is taken to maximise the value computed for the Flux. For many products, the operating pressure was not mentioned, but instead the Max TMP (transmembrane pressure) was mentioned. In these cases if the Max TMP was above 1 bar, then for the flux calculation, the operating pressure was taken as 1 bar and not the Max TMP. This gives a higher value for the Flux.

<sup>d</sup> For Zeeweed 1000, the data sheets provides an approximate range of the membrane area. In this case again, a lower value of the membrane area is taken for the calculation of flux.

<sup>e</sup> PWP (LMH.bar<sup>-1</sup>) = Filtration rate [L.hr<sup>-1</sup>] / (Membrane area [m<sup>2</sup>] x TMP [bar])  
= Filtrate Flux [L.m<sup>-2</sup>.hr<sup>-1</sup>]/TMP [bar]

## References

1. A. Bottino, G. Camera-Roda, G. Capannelli and S. Munari, *Journal of Membrane Science*, 1991, **57**, 1-20.
2. Q. Li, Z.-L. Xu and L.-Y. Yu, *Journal of Applied Polymer Science*, 2010, **115**, 2277-2287.
3. D. Wang, K. Li and W. K. Teo, *Journal of Membrane Science*, 1999, **163**, 211-220.
4. D. Wang, K. Li and W. K. Teo, *Journal of Membrane Science*, 2000, **178**, 13-23.
5. M. Khayet, C. Y. Feng, K. C. Khulbe and T. Matsuura, *Polymer*, 2002, **43**, 3879-3890.

6. M. Khayet, C. Y. Feng, K. C. Khulbe and T. Matsuura, *Desalination*, 2002, **148**, 321-327.
7. X. Wang, M. Zhou, X. Meng, L. Wang and D. Huang, *Frontiers of Environmental Science & Engineering*, 2016, **10**, 1-11.
8. S. P. Nunes and K. V. Peinemann, *Journal of Membrane Science*, 1992, **73**, 25-35.
9. J. Lv, G. Zhang, H. Zhang, C. Zhao and F. Yang, *Applied Surface Science*, 2018, **440**, 1091-1100.
10. E. Yuliwati and A. F. Ismail, *Desalination*, 2011, **273**, 226-234.
11. X. Cao, J. Ma, X. Shi and Z. Ren, *Applied Surface Science*, 2006, **253**, 2003-2010.
12. L. Yan, Y. S. Li and C. B. Xiang, *Polymer*, 2005, **46**, 7701-7706.
13. L.-Y. Yu, Z.-L. Xu, H.-M. Shen and H. Yang, *Journal of Membrane Science*, 2009, **337**, 257-265.
14. Y. Wei, H.-Q. Chu, B.-Z. Dong, X. Li, S.-J. Xia and Z.-M. Qiang, *Desalination*, 2011, **272**, 90-97.
15. Z. Wang, H. Yu, J. Xia, F. Zhang, F. Li, Y. Xia and Y. Li, *Desalination*, 2012, **299**, 50-54.
16. X. Chang, Z. Wang, S. Quan, Y. Xu, Z. Jiang and L. Shao, *Applied Surface Science*, 2014, **316**, 537-548.
17. M. Safarpour, A. Khataee and V. Vatanpour, *Industrial & Engineering Chemistry Research*, 2014, **53**, 13370-13382.
18. C. Zhao, X. Xu, J. Chen and F. Yang, *Journal of Environmental Chemical Engineering*, 2013, **1**, 349-354.
19. S. Ayyaru, T. T. L. Dinh and Y.-H. Ahn, *Chemosphere*, 2020, **241**, 125068.
20. Z. Xu, T. Wu, J. Shi, K. Teng, W. Wang, M. Ma, J. Li, X. Qian, C. Li and J. Fan, *Journal of Membrane Science*, 2016, **520**, 281-293.
21. Y. H. Tan, P. S. Goh, A. F. Ismail, B. C. Ng and G. S. Lai, *Chemical Engineering Journal*, 2017, **308**, 359-369.
22. C. Ma, J. Hu, W. Sun, Z. Ma, W. Yang, L. Wang, Z. Ran, B. Zhao, Z. Zhang and H. Zhang, *Chemosphere*, 2020, **253**, 126649.
23. G. Zeng, Y. He, Z. Yu, Y. Zhan, L. Ma and L. Zhang, *Applied Surface Science*, 2016, **371**, 624-632.
24. H. Yu, L. Gu, S. Wu, G. Dong, X. Qiao, K. Zhang, X. Lu, H. Wen and D. Zhang, *Separation and Purification Technology*, 2020, **247**, 116889.
25. S. Arefi-Oskoui, V. Vatanpour and A. Khataee, *Journal of Industrial and Engineering Chemistry*, 2016, **41**, 23-32.
26. M. A. Tofighy, T. Mohammadi and M. H. Sadeghi, *Journal of Applied Polymer Science*, 2021, **138**, 49718.
27. A. Zhou, R. Jia, Y. Wang, S. Sun, X. Xin, M. Wang, Q. Zhao and H. Zhu, *Separation and Purification Technology*, 2020, **234**, 116099.
28. J. Hong and Y. He, *Desalination*, 2014, **332**, 67-75.
29. Q. Liu, S. Huang, Y. Zhang and S. Zhao, *Journal of Colloid and Interface Science*, 2018, **515**, 109-118.
30. J. Zhu, S. Zhou, M. Li, A. Xue, Y. Zhao, W. Peng and W. Xing, *Journal of Membrane Science*, 2020, **612**, 118467.
31. E. Abdollahi, A. Heidari, T. Mohammadi, A. A. Asadi and M. Ahmadzadeh Tofighy, *Separation and Purification Technology*, 2021, **257**, 117931.
32. Y. H. Teow, A. A. Latif, J. K. Lim, H. P. Ngang, L. Y. Susan and B. S. Ooi, *Journal of Applied Polymer Science*, 2015, **132**.
33. M. Safarpour, A. Khataee and V. Vatanpour, *Separation and Purification Technology*, 2015, **140**, 32-42.
34. L. Shao, Z. X. Wang, Y. L. Zhang, Z. X. Jiang and Y. Y. Liu, *Journal of Membrane Science*, 2014, **461**, 10-21.
35. X. Liu, H. Yuan, C. Wang, S. Zhang, L. Zhang, X. Liu, F. Liu, X. Zhu, S. Rohani, C. Ching and J. Lu, *Separation and Purification Technology*, 2020, **233**, 116038.
36. X. Fu, L. Zhu, S. Liang, Y. Jin and S. Yang, *Journal of Membrane Science*, 2020, **603**, 118046.



37. H. Liu, G. Zhang, C. Zhao, J. Liu and F. Yang, *Journal of Materials Chemistry A*, 2015, **3**, 20277-20287.
38. X. Zhao and C. He, *ACS Applied Materials & Interfaces*, 2015, **7**, 17947-17953.
39. H. Thankappan, G. Bousquet, M. Semsarilar, A. Venault, Y. Chang, D. Bouyer and D. Quemener, *Membranes*, 2019, **9**.
40. P. Wang, J. Ma, Z. Wang, F. Shi and Q. Liu, *Langmuir*, 2012, **28**, 4776-4786.
41. H. Wang, X. Zhao and C. He, *Separation and Purification Technology*, 2016, **166**, 1-8.
42. B. Saini, D. Vaghani, S. Khuntia, M. K. Sinha, A. Patel and R. Pindoria, *Journal of Membrane Science*, 2020, **603**, 118047.
43. S. Wang, T. Li, C. Chen, B. Liu and J. C. Crittenden, *Frontiers of Environmental Science & Engineering*, 2017, **12**, 3.
44. B. Liu, C. Chen, T. Li, J. Crittenden and Y. Chen, *Journal of Membrane Science*, 2013, **445**, 66-75.
45. T. Wu, B. Zhou, T. Zhu, J. Shi, Z. Xu, C. Hu and J. Wang, *RSC Advances*, 2015, **5**, 7880-7889.
46. Z. Zhao, J. Zheng, M. Wang, H. Zhang and C. C. Han, *Journal of Membrane Science*, 2012, **394-395**, 209-217.
47. DUPONT, IntegraPac™ Ultrafiltration Modules Product Data Sheet, <https://www.dupont.com/content/dam/dupont/amer/us/en/water-solutions/public/documents/en/45-D01162-en.pdf>, (accessed 02 June 2021).
48. DUPONT, IntegraFlux™ Ultrafiltration Modules Product Data Sheet, <https://www.dupont.com/content/dam/dupont/amer/us/en/water-solutions/public/documents/en/45-D01048-en.pdf>, (accessed 02 June 2021).
49. Suez, ZeeWeed immersed ultrafiltration model ZW1000 fact sheet, <https://www.suezwatertechnologies.com/products/ultrafiltration/zeeweeds-1000-membrane>, (accessed 02 June 2021).
50. Suez, ZeeWeed pressured ultrafiltration model ZW1500, <https://www.suezwatertechnologies.com/products/ultrafiltration/zeeweeds-1500-membrane>).
51. H. N. G. Company, Capillary Ultrafiltration Module HYDRAcap® MAX 80, <https://membranes.com/solutions/products/uf/hydracap-max/>, (accessed 02 June 2021).
52. KOCH, PURON® MP Hollow Fiber Cartridge Datasheet, <https://www.kochseparation.com/wp-content/uploads/2020/10/puron-mp-8081-pressurized-hollow-fiber-uf-modules.pdf>, (accessed 02 June 2021).
53. QUA®, EnviQ® Submerged Ultrafiltration Membranes, <https://quagroup.com/wp-content/uploads/QUA-EnviQ-Data-Sheet-1.pdf>, (accessed 02 June 2021).
54. TORAY, MEMBRAY™ submerged Flat sheet Membrane Modules for MBR, <https://pureaqua.com/content/pdf/membray-submerged-flat-sheet-membrane-modules-for-mbr-tmr140-series-data-sheet.pdf>, (accessed 02 June 2021).
